# Supplementary material
Source: PubMed Central journal article supplement (PMC7453886)
Supplement: jciinsight-5-138101-s210.pdf [file jciinsight-5-138101-s210.pdf]

Patient's thoracic CT scan

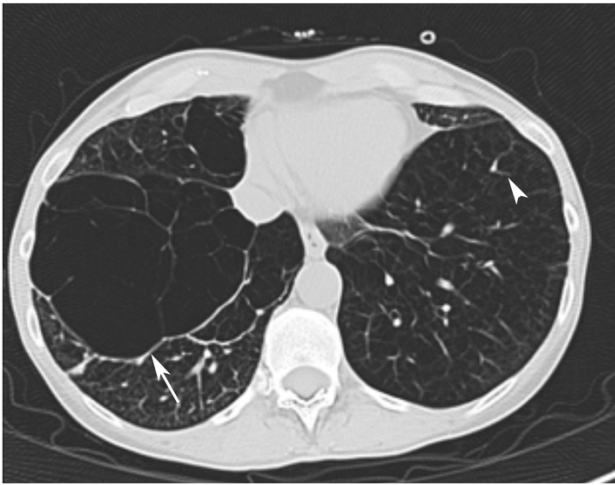

**Supplementary Fig. 1.** Representative image of the patient's thoracic CT showing lower lobes of the lung involved with extensive emphysema, with loss of normal lung tissue density (arrowhead) and large bulla formation (arrow).

Supplementary Table S1. SNPs within *IGSF3* associated with COPD phenotypes.

| SNP (IGSF3 W-20 kb) | BP (chr3:7 p13) | Loc      | COPD-NEW |      |         |             |           |         |      |             |       |      | COPD-AA |             |           |         |      |             |  |  |  |  |
|---------------------|-----------------|----------|----------|------|---------|-------------|-----------|---------|------|-------------|-------|------|---------|-------------|-----------|---------|------|-------------|--|--|--|--|
|                     |                 |          | Est      | SE   | r-value | Prox        | Corr 2.5% | Corr 5% | N    | P           | Est   | SE   | r-value | Prox        | Corr 2.5% | Corr 5% | N    | P           |  |  |  |  |
| <b>rs3386747</b>    | <b>11719415</b> | CGD      | 0.12     | 0.06 | 1.88    | <b>0.86</b> | 0.00      | 0.24    | 5937 | <b>0.22</b> | -0.05 | 0.07 | 0.76    | <b>0.45</b> | -0.09     | 0.20    | 2727 | <b>0.81</b> |  |  |  |  |
| <b>rs1730891</b>    | <b>11719396</b> | CGD      | 0.18     | 0.09 | 2.01    | <b>0.84</b> | 0.01      | 0.26    | 5916 | <b>0.22</b> | 0.02  | 0.10 | 0.22    | <b>0.83</b> | -0.16     | 0.20    | 2723 | <b>0.81</b> |  |  |  |  |
| <b>rs1414272</b>    | <b>11715868</b> | Genomic  | 0.02     | 0.04 | 0.49    | <b>0.83</b> | -0.07     | 0.11    | 5935 | <b>0.86</b> | 0.04  | 0.09 | 0.51    | <b>0.41</b> | -0.12     | 0.21    | 2729 | <b>0.81</b> |  |  |  |  |
| <b>rs4687084</b>    | <b>11720603</b> | Intronic | 0.14     | 0.06 | 2.42    | <b>0.82</b> | -0.03     | 0.26    | 6000 | <b>0.65</b> | 0.01  | 0.12 | 0.22    | <b>0.81</b> | -0.22     | 0.20    | 2734 | <b>0.81</b> |  |  |  |  |
| <b>rs1586492</b>    | <b>11721865</b> | Intronic | -0.03    | 0.05 | -0.55   | <b>0.88</b> | -0.12     | 0.07    | 5927 | <b>0.86</b> | 0.03  | 0.08 | 0.31    | <b>0.76</b> | -0.14     | 0.19    | 2725 | <b>0.81</b> |  |  |  |  |
| <b>rs4783791</b>    | <b>11721210</b> | Exon 11  | 0.00     | 0.05 | -0.03   | <b>0.87</b> | -0.11     | 0.10    | 5928 | <b>0.89</b> | 0.03  | 0.06 | 0.39    | <b>0.70</b> | -0.10     | 0.19    | 2722 | <b>0.81</b> |  |  |  |  |
| <b>rs1587622</b>    | <b>11720612</b> | Genomic  | 0.22     | 0.08 | 2.98    | <b>0.89</b> | -0.08     | 0.28    | 6021 | <b>0.83</b> | 0.19  | 0.13 | -1.02   | <b>0.73</b> | 0.44      | 0.16    | 2724 | <b>0.81</b> |  |  |  |  |
| <b>rs1730817</b>    | <b>11717882</b> | Intronic | 0.05     | 0.04 | 1.17    | <b>0.84</b> | -0.03     | 0.13    | 5925 | <b>0.87</b> | 0.20  | 0.08 | 0.38    | <b>0.82</b> | 0.03      | 0.20    | 2729 | <b>0.80</b> |  |  |  |  |
| <b>rs1523773</b>    | <b>11715269</b> | Intronic | 0.00     | 0.04 | 0.02    | <b>0.89</b> | -0.08     | 0.08    | 5927 | <b>0.89</b> | 0.01  | 0.07 | 0.14    | <b>0.88</b> | -0.13     | 0.15    | 2727 | <b>0.81</b> |  |  |  |  |
| <b>rs468684</b>     | <b>11715868</b> | Genomic  | 0.02     | 0.05 | 0.24    | <b>0.73</b> | -0.08     | 0.21    | 5927 | <b>0.90</b> | -0.05 | 0.14 | -1.03   | <b>0.85</b> | -0.43     | 0.11    | 2729 | <b>0.87</b> |  |  |  |  |
| <b>rs181183</b>     | <b>11720634</b> | Intronic | 0.05     | 0.05 | 1.13    | <b>0.86</b> | -0.04     | 0.15    | 5923 | <b>0.87</b> | 0.08  | 0.08 | 1.02    | <b>0.31</b> | -0.07     | 0.23    | 2721 | <b>0.87</b> |  |  |  |  |
| <b>rs468684</b>     | <b>11720634</b> | Intronic | 0.04     | 0.06 | 0.68    | <b>0.89</b> | -0.07     | 0.15    | 5983 | <b>0.86</b> | -0.15 | 0.14 | -1.02   | <b>0.88</b> | -0.48     | 0.10    | 2726 | <b>0.87</b> |  |  |  |  |
| <b>rs468684</b>     | <b>11720634</b> | Intronic | 0.04     | 0.06 | 0.68    | <b>0.89</b> | -0.07     | 0.15    | 5983 | <b>0.86</b> | -0.15 | 0.14 | -1.02   | <b>0.88</b> | -0.48     | 0.10    | 2726 | <b>0.87</b> |  |  |  |  |
| <b>rs468684</b>     | <b>11720634</b> | Intronic | 0.04     | 0.06 | 0.68    | <b>0.89</b> | -0.07     | 0.15    | 5983 | <b>0.86</b> | -0.15 | 0.14 | -1.02   | <b>0.88</b> | -0.48     | 0.10    | 2726 | <b>0.87</b> |  |  |  |  |
| <b>rs468684</b>     | <b>11720634</b> | Intronic | 0.04     | 0.06 | 0.68    | <b>0.89</b> | -0.07     | 0.15    | 5983 | <b>0.86</b> | -0.15 | 0.14 | -1.02   | <b>0.88</b> | -0.48     | 0.10    | 2726 | <b>0.87</b> |  |  |  |  |
| <b>rs468684</b>     | <b>11720634</b> | Intronic | 0.04     | 0.06 | 0.68    | <b>0.89</b> | -0.07     | 0.15    | 5983 | <b>0.86</b> | -0.15 | 0.14 | -1.02   | <b>0.88</b> | -0.48     | 0.10    | 2726 | <b>0.87</b> |  |  |  |  |
| <b>rs468684</b>     | <b>11720634</b> | Intronic | 0.04     | 0.06 | 0.68    | <b>0.89</b> | -0.07     | 0.15    | 5983 | <b>0.86</b> | -0.15 | 0.14 | -1.02   | <b>0.88</b> | -0.48     | 0.10    | 2726 | <b>0.87</b> |  |  |  |  |
| <b>rs468684</b>     | <b>11720634</b> | Intronic | 0.04     | 0.06 | 0.68    | <b>0.89</b> | -0.07     | 0.15    | 5983 | <b>0.86</b> | -0.15 | 0.14 | -1.02   | <b>0.88</b> | -0.48     | 0.10    | 2726 | <b>0.87</b> |  |  |  |  |
| <b>rs468684</b>     | <b>11720634</b> | Intronic | 0.04     | 0.06 | 0.68    | <b>0.89</b> | -0.07     | 0.15    | 5983 | <b>0.86</b> | -0.15 | 0.14 | -1.02   | <b>0.88</b> | -0.48     | 0.10    | 2726 | <b>0.87</b> |  |  |  |  |
| <b>rs468684</b>     | <b>11720634</b> | Intronic | 0.04     | 0.06 | 0.68    | <b>0.89</b> | -0.07     | 0.15    | 5983 | <b>0.86</b> | -0.15 | 0.14 | -1.02   | <b>0.88</b> | -0.48     | 0.10    | 2726 | <b>0.87</b> |  |  |  |  |
| <b>rs468684</b>     | <b>11720634</b> | Intronic | 0.04     | 0.06 | 0.68    | <b>0.89</b> | -0.07     | 0.15    | 5983 | <b>0.86</b> | -0.15 | 0.14 | -1.02   | <b>0.88</b> | -0.48     | 0.10    | 2726 | <b>0.87</b> |  |  |  |  |
| <b>rs468684</b>     | <b>11720634</b> | Intronic | 0.04     | 0.06 | 0.68    | <b>0.89</b> | -0.07     | 0.15    | 5983 | <b>0.86</b> | -0.15 | 0.14 | -1.02   | <b>0.88</b> | -0.48     | 0.10    | 2726 | <b>0.87</b> |  |  |  |  |
| <b>rs468684</b>     | <b>11720634</b> | Intronic | 0.04     | 0.06 | 0.68    | <b>0.89</b> | -0.07     | 0.15    | 5983 | <b>0.86</b> | -0.15 | 0.14 | -1.02   | <b>0.88</b> | -0.48     | 0.10    | 2726 | <b>0.87</b> |  |  |  |  |
| <b>rs468684</b>     | <b>11720634</b> | Intronic | 0.04     | 0.06 | 0.68    | <b>0.89</b> | -0.07     | 0.15    | 5983 | <b>0.86</b> | -0.15 | 0.14 | -1.02   | <b>0.88</b> | -0.48     | 0.10    | 2726 | <b>0.87</b> |  |  |  |  |
| <b>rs468684</b>     | <b>11720634</b> | Intronic | 0.04     | 0.06 | 0.68    | <b>0.89</b> | -0.07     | 0.15    | 5983 | <b>0.86</b> | -0.15 | 0.14 | -1.02   | <b>0.88</b> | -0.48     | 0.10    | 2726 | <b>0.87</b> |  |  |  |  |
| <b>rs468684</b>     | <b>11720634</b> | Intronic | 0.04     | 0.06 | 0.68    | <b>0.89</b> | -0.07     | 0.15    | 5983 | <b>0.86</b> | -0.15 | 0.14 | -1.02   | <b>0.88</b> | -0.48     | 0.10    | 2726 | <b>0.87</b> |  |  |  |  |
| <b>rs468684</b>     | <b>11720634</b> | Intronic | 0.04     | 0.06 | 0.68    | <b>0.89</b> | -0.07     | 0.15    | 5983 | <b>0.86</b> | -0.15 | 0.14 | -1.02   | <b>0.88</b> | -0.48     | 0.10    | 2726 | <b>0.87</b> |  |  |  |  |
| <b>rs468684</b>     | <b>11720634</b> | Intronic | 0.04     | 0.06 | 0.68    | <b>0.89</b> | -0.07     | 0.15    | 5983 | <b>0.86</b> | -0.15 | 0.14 | -1.02   | <b>0.88</b> | -0.48     | 0.10    | 2726 | <b>0.87</b> |  |  |  |  |
| <b>rs468684</b>     | <b>11720634</b> | Intronic | 0.04     | 0.06 | 0.68    | <b>0.89</b> | -0.07     | 0.15    | 5983 | <b>0.86</b> | -0.15 | 0.14 | -1.02   | <b>0.88</b> | -0.48     | 0.10    | 2726 | <b>0.87</b> |  |  |  |  |
| <b>rs468684</b>     | <b>11720634</b> | Intronic | 0.04     | 0.06 | 0.68    | <b>0.89</b> | -0.07     | 0.15    | 5983 | <b>0.86</b> | -0.15 | 0.14 | -1.02   | <b>0.88</b> | -0.48     | 0.10    | 2726 | <b>0.87</b> |  |  |  |  |
| <b>rs468684</b>     | <b>11720634</b> | Intronic | 0.04     | 0.06 | 0.68    | <b>0.89</b> | -0.07     | 0.15    | 5983 | <b>0.86</b> | -0.15 | 0.14 | -1.02   | <b>0.88</b> | -0.48     | 0.10    | 2726 | <b>0.87</b> |  |  |  |  |
| <b>rs468684</b>     | <b>11720634</b> | Intronic | 0.04     | 0.06 | 0.68    | <b>0.89</b> | -0.07     | 0.15    | 5983 | <b>0.86</b> | -0.15 | 0.14 | -1.02   | <b>0.88</b> | -0.48     | 0.10    | 2726 | <b>0.87</b> |  |  |  |  |
| <b>rs468684</b>     | <b>11720634</b> | Intronic | 0.04     | 0.06 | 0.68    | <b>0.89</b> | -0.07     | 0.15    | 5983 | <b>0.86</b> | -0.15 | 0.14 | -1.02   | <b>0.88</b> | -0.48     | 0.10    | 2726 | <b>0.87</b> |  |  |  |  |
| <b>rs468684</b>     | <b>11720634</b> | Intronic | 0.04     | 0.06 | 0.68    | <b>0.89</b> | -0.07     | 0.15    | 5983 | <b>0.86</b> | -0.15 | 0.14 | -1.02   | <b>0.88</b> | -0.48     | 0.10    | 2726 | <b>0.87</b> |  |  |  |  |
| <b>rs468684</b>     | <b>11720634</b> | Intronic | 0.04     | 0.06 | 0.68    | <b>0.89</b> | -0.07     | 0.15    | 5983 | <b>0.86</b> | -0.15 | 0.14 | -1.02   | <b>0.88</b> | -0.48     | 0.10    | 2726 | <b>0.87</b> |  |  |  |  |
| <b>rs468684</b>     | <b>11720634</b> | Intronic | 0.04     | 0.06 | 0.68    | <b>0.89</b> | -0.07     | 0.15    | 5983 | <b>0.86</b> | -0.15 | 0.14 | -1.02   | <b>0.88</b> | -0.48     | 0.10    | 2726 | <b>0.87</b> |  |  |  |  |
| <b>rs468684</b>     | <b>11720634</b> | Intronic | 0.04     | 0.06 | 0.68    | <b>0.89</b> | -0.07     | 0.15    | 5983 | <b>0.86</b> | -0.15 | 0.14 | -1.02   | <b>0.88</b> | -0.48     | 0.10    | 2726 | <b>0.87</b> |  |  |  |  |
| <b>rs468684</b>     | <b>11720634</b> | Intronic | 0.04     | 0.06 | 0.68    | <b>0.89</b> | -0.07     | 0.15    | 5983 | <b>0.86</b> | -0.15 | 0.14 | -1.02   | <b>0.88</b> | -0.48     | 0.10    | 2726 | <b>0.87</b> |  |  |  |  |
| <b>rs468684</b>     | <b>11720634</b> | Intronic | 0.04     | 0.06 | 0.68    | <b>0.89</b> | -0.07     | 0.15    | 5983 | <b>0.86</b> | -0.15 | 0.14 | -1.02   | <b>0.88</b> | -0.48     | 0.10    | 2726 | <b>0.87</b> |  |  |  |  |
| <b>rs468684</b>     | <b>11720634</b> | Intronic | 0.04     | 0.06 | 0.68    | <b>0.89</b> | -0.07     | 0.15    | 5983 | <b>0.86</b> | -0.15 | 0.14 | -1.02   | <b>0.88</b> | -0.48     | 0.10    | 2726 | <b>0.87</b> |  |  |  |  |
| <b>rs468684</b>     | <b>11720634</b> | Intronic | 0.04     | 0.06 | 0.68    | <b>0.89</b> | -0.07     | 0.15    | 5983 | <b>0.86</b> | -0.15 | 0.14 | -1.02   | <b>0.88</b> | -0.48     | 0.10    | 2726 | <b>0.87</b> |  |  |  |  |
| <b>rs468684</b>     | <b>11720634</b> | Intronic | 0.04     | 0.06 | 0.68    | <b>0.89</b> | -0.07     | 0.15    | 5983 | <b>0.86</b> | -0.15 | 0.14 | -1.02   | <b>0.88</b> | -0.48     | 0.10    | 2726 | <b>0.87</b> |  |  |  |  |
| <b>rs468684</b>     | <b>11720634</b> | Intronic | 0.04     | 0.06 | 0.68    | <b>0.89</b> | -0.07     | 0.15    | 5983 | <b>0.86</b> | -0.15 | 0.14 | -1.02   | <b>0.88</b> | -0.48     | 0.10    | 2726 | <b>0.87</b> |  |  |  |  |
| <b>rs468684</b>     | <b>11720634</b> | Intronic | 0.04     | 0.06 | 0.68    | <b>0.89</b> | -0.07     | 0.15    | 5983 | <b>0.86</b> | -0.15 | 0.14 | -1.02   | <b>0.88</b> | -0.48     | 0.10    | 2726 | <b>0.87</b> |  |  |  |  |
| <b>rs468684</b>     | <b>11720634</b> | Intronic | 0.04     | 0.06 | 0.68    | <b>0.89</b> | -0.07     | 0.15    | 5983 | <b>0.86</b> | -0.15 | 0.14 | -1.02   | <b>0.88</b> | -0.48     | 0.10    | 2726 | <b>0.87</b> |  |  |  |  |
| <b>rs468684</b>     | <b>11720634</b> | Intronic | 0.04     | 0.06 | 0.68    | <b>0.89</b> | -0.07     | 0.15    | 5983 | <b>0.86</b> | -0.15 | 0.14 | -1.02   | <b>0.88</b> | -0.48     | 0.10    | 2726 | <b>0.87</b> |  |  |  |  |
| <b>rs468684</b>     | <b>11720634</b> | Intronic | 0.04     | 0.06 | 0.68    | <b>0.89</b> | -0.07     | 0.15    | 5983 | <b>0.86</b> | -0.15 | 0.14 | -1.02   | <b>0.88</b> | -0.48     | 0.10    | 2726 | <b>0.87</b> |  |  |  |  |
| <b>rs468684</b>     | <b>11720634</b> | Intronic | 0.04     | 0.06 | 0.68    | <b>0.89</b> | -0.07     | 0.15    | 5983 | <b>0.86</b> | -0.15 | 0.14 | -1.02   | <b>0.88</b> | -0.48     | 0.10    | 2726 | <b>0.87</b> |  |  |  |  |
| <b>rs468684</b>     | <b>11720634</b> | Intronic | 0.04     | 0.06 | 0.68    | <b>0.89</b> | -0.07     | 0.15    | 5983 | <b>0.86</b> | -0.15 | 0.14 | -1.02   | <b>0.88</b> | -0.48     | 0.10    | 2726 | <b>0.87</b> |  |  |  |  |
| <b>rs468684</b>     | <b>11720634</b> | Intronic | 0.04     | 0.06 | 0.68    | <b>0.89</b> | -0.07     | 0.15    | 5983 | <b>0.86</b> | -0.15 | 0.14 | -1.02   | <b>0.88</b> | -0.48     | 0.10    | 2726 | <b>0.87</b> |  |  |  |  |
| <b>rs468684</b>     | <b>11720634</b> | Intronic | 0.04     | 0.06 | 0.68    | <b>0.89</b> | -0.07     | 0.15    | 5983 | <b>0.86</b> | -0.15 | 0.14 | -1.02   | <b>0.88</b> | -0.48     | 0.10    | 2726 | <b>0.87</b> |  |  |  |  |
| <b>rs468684</b>     | <b>11720634</b> | Intronic | 0.04     | 0.06 | 0.68    | <b>0.89</b> | -0.07     | 0.15    | 5983 | <b>0.86</b> | -0.15 | 0.14 | -1.02   | <b>0.88</b> | -0.48     | 0.10    | 2726 | <b>0.87</b> |  |  |  |  |
| <b>rs468684</b>     | <b>11720634</b> | Intronic | 0.04     | 0.06 | 0.68    | <b>0.89</b> | -0.07     | 0.15    | 5983 | <b>0.86</b> | -0.15 | 0.14 | -1.02   | <b>0.88</b> | -0.48     | 0.10    | 2726 | <b>0.87</b> |  |  |  |  |
| <b>rs468684</b>     | <b>11720634</b> | Intronic | 0.04     | 0.06 | 0.6     |             |           |         |      |             |       |      |         |             |           |         |      |             |  |  |  |  |

**Supplementary Table ST2.** Gene enrichment linked to subcellular localization in subject differentially expressed in patient versus control lymphoblastoids

| <i>GO cellular component complete</i>          | <i>N (patient)</i> | <i>N (control)</i> | <i>Expected</i> | <i>Fold</i>       | <i>+/-</i> | <i>raw P</i> | <i>FDR</i> |
|------------------------------------------------|--------------------|--------------------|-----------------|-------------------|------------|--------------|------------|
|                                                |                    |                    |                 | <i>Enrichment</i> |            | <i>value</i> |            |
| <i>endoplasmic reticulum chaperone complex</i> | 11                 | 5                  | 0.39            | 12.86             | +          | 1.46E-04     | 6.75E-03   |
| <i>ubiquitin conjugating enzyme complex</i>    | 9                  | 4                  | 0.32            | 12.58             | +          | 7.52E-04     | 2.79E-02   |
| <i>endoplasmic reticulum exit site</i>         | 27                 | 7                  | 0.95            | 7.34              | +          | 1.26E-04     | 6.42E-03   |
| <i>rough endoplasmic reticulum membrane</i>    | 29                 | 6                  | 1.02            | 5.85              | +          | 1.08E-03     | 3.66E-02   |
| <i>U2-type precatalytic spliceosome</i>        | 43                 | 7                  | 1.52            | 4.61              | +          | 1.46E-03     | 4.65E-02   |
| <i>melanosome</i>                              | 106                | 15                 | 3.75            | 4                 | +          | 1.62E-05     | 9.73E-04   |
| <i>proteasome complex</i>                      | 67                 | 9                  | 2.37            | 3.8               | +          | 1.11E-03     | 3.70E-02   |
| <i>large ribosomal subunit</i>                 | 125                | 13                 | 4.42            | 2.94              | +          | 9.04E-04     | 3.12E-02   |
| <i>mitochondrial protein complex</i>           | 272                | 22                 | 9.61            | 2.29              | +          | 5.52E-04     | 2.12E-02   |
| <i>focal adhesion</i>                          | 404                | 31                 | 14.28           | 2.17              | +          | 1.34E-04     | 6.51E-03   |
| <i>extracellular exosome</i>                   | 2097               | 133                | 74.11           | 1.79              | +          | 1.03E-10     | 1.10E-08   |
| <i>membrane protein complex</i>                | 1203               | 66                 | 42.51           | 1.55              | +          | 7.63E-04     | 2.78E-02   |
